# Supplementary material for: Threats to Validity in the Design and Conduct of Preclinical Efficacy Studies: A Systematic Review of Guidelines for In Vivo Animal Experiments
Source: PubMed Central journal article supplement (PMC3720257; doi:10.1371/journal.pmed.1001489), 2013-07-23
Supplement: pmed.1001489.s002.pdf [file pmed.1001489.s002.pdf]

This checklist concerns the design and conduct of *in vivo* preclinical studies that are performed to establish the clinical utility of new treatments (“efficacy studies”). In particular, the checklist is aimed at helping researchers, reviewers, and others determine whether a given experiment or a group of experiments has addressed factors that threaten the reliability and clinical generalizability of study findings. Items below should be clearly reported in publications. Note: This checklist has not undergone a formal development and validation process, including evaluations of face, criterion, and content validity.

## Internal Validity

|            |                                                                                                                                                                                   | Yes                      | No                       |
|------------|-----------------------------------------------------------------------------------------------------------------------------------------------------------------------------------|--------------------------|--------------------------|
| <b>1a</b>  | Were treatments allocated to animals using a randomized procedure?                                                                                                                | <input type="checkbox"/> | <input type="checkbox"/> |
| <b>1b</b>  | If “Yes”, describe the method used to generate the randomization sequence:                                                                                                        |                          |                          |
| <b>1c</b>  | If non-randomized allocation was used, were groups balanced by another characteristic (e.g. sex, age, disease status)?                                                            | <input type="checkbox"/> | <input type="checkbox"/> |
| <b>2</b>   | Was the handling of animals before and during the experiment uniform (e.g. same handlers, standardized animal training)?                                                          | <input type="checkbox"/> | <input type="checkbox"/> |
| <b>3</b>   | Was the emergence of confounding physiological variables monitored and addressed (e.g. blood pressure, body temperature)?                                                         | <input type="checkbox"/> | <input type="checkbox"/> |
| <b>4</b>   | If anesthesia or analgesia were used during the experiment, were potential confounding effects on outcomes addressed?                                                             | <input type="checkbox"/> | <input type="checkbox"/> |
| <b>5</b>   | Were appropriate controls used in all <i>in vivo</i> experiments (e.g. positive, negative)?                                                                                       | <input type="checkbox"/> | <input type="checkbox"/> |
| <b>6</b>   | Was treatment allocation concealed from the investigators during the experiment?                                                                                                  | <input type="checkbox"/> | <input type="checkbox"/> |
| <b>7</b>   | Were investigators blinded to treatment allocation during outcome assessment?                                                                                                     | <input type="checkbox"/> | <input type="checkbox"/> |
| <b>8</b>   | Has a dose-response treatment effect been demonstrated?                                                                                                                           | <input type="checkbox"/> | <input type="checkbox"/> |
| <b>9</b>   | Were measures taken to ensure that outcome assessment techniques were consistent and reproducible (e.g. training of research personnel, performing assessments in same location)? | <input type="checkbox"/> | <input type="checkbox"/> |
| <b>10</b>  | Has precision of the treatment effect been justified, and is choice of measure of dispersion justified?                                                                           | <input type="checkbox"/> | <input type="checkbox"/> |
| <b>11</b>  | Are the statistical tests appropriate, reported in detail, and sufficiently justified?                                                                                            | <input type="checkbox"/> | <input type="checkbox"/> |
| <b>12</b>  | Has every animal been accounted for, from entry into experiment through treatment, outcome assessment, sacrifice and analysis?                                                    | <input type="checkbox"/> | <input type="checkbox"/> |
| <b>13a</b> | Has a power calculation been performed <i>a priori</i> to determine sample size?                                                                                                  | <input type="checkbox"/> | <input type="checkbox"/> |
| <b>13b</b> | If “No,” how was the sample size chosen:                                                                                                                                          |                          |                          |

## External Validity

|           |                                                                          | Yes                      | No                       |
|-----------|--------------------------------------------------------------------------|--------------------------|--------------------------|
| <b>14</b> | Have treatment effects been demonstrated in more than one model?         | <input type="checkbox"/> | <input type="checkbox"/> |
| <b>15</b> | Have treatment effects been replicated by an independent research group? | <input type="checkbox"/> | <input type="checkbox"/> |

## Construct Validity

|            |                                                                                                                                                     | Yes                      | No                       |
|------------|-----------------------------------------------------------------------------------------------------------------------------------------------------|--------------------------|--------------------------|
| <b>16a</b> | Is the selected animal model the best available representation of human disease?                                                                    | <input type="checkbox"/> | <input type="checkbox"/> |
| <b>16b</b> | If "Yes", on what basis?                                                                                                                            |                          |                          |
| <b>17</b>  | Did the experiment simulate the delivery of treatments that are co-administered in typical clinical settings?                                       | <input type="checkbox"/> | <input type="checkbox"/> |
| <b>18</b>  | Have comorbidities typical of clinical settings been simulated in the experiment?                                                                   | <input type="checkbox"/> | <input type="checkbox"/> |
| <b>19</b>  | Does the age of animals match the age of patients in relevant clinical settings?                                                                    | <input type="checkbox"/> | <input type="checkbox"/> |
| <b>20a</b> | Were basic animal characteristics sufficiently defined at baseline (e.g. strain, sex, age, disease status)?                                         | <input type="checkbox"/> | <input type="checkbox"/> |
| <b>20b</b> | Were predetermined inclusion and exclusion criteria used?                                                                                           | <input type="checkbox"/> | <input type="checkbox"/> |
| <b>21</b>  | Has the timing of treatment administration been matched to the timing of administration anticipated in clinical settings?                           | <input type="checkbox"/> | <input type="checkbox"/> |
| <b>22</b>  | Was appropriate delivery of treatment confirmed (e.g. to the appropriate organ system or compartment)?                                              | <input type="checkbox"/> | <input type="checkbox"/> |
| <b>23</b>  | Were confounders that might result from treatment addressed (e.g. effects of a drug on other systems, complications from treatment administration)? | <input type="checkbox"/> | <input type="checkbox"/> |
| <b>24</b>  | Were the measures of disease response the best available representations of those used in clinical settings?                                        | <input type="checkbox"/> | <input type="checkbox"/> |
| <b>25</b>  | Have the outcome assessment techniques and criteria been validated and shown to be reproducible?                                                    | <input type="checkbox"/> | <input type="checkbox"/> |
| <b>26</b>  | Have treatment effects been demonstrated using more than one measure of response?                                                                   | <input type="checkbox"/> | <input type="checkbox"/> |
| <b>27</b>  | Has treatment response been demonstrated at a mechanistic level?                                                                                    | <input type="checkbox"/> | <input type="checkbox"/> |
| <b>28</b>  | Are there aspects of the experimental environment that could interfere with clinical generalization (e.g. stressors such as noise, housing)?        | <input type="checkbox"/> | <input type="checkbox"/> |

## Research Program

|           |                                                                                                   | Yes                      | No                       |
|-----------|---------------------------------------------------------------------------------------------------|--------------------------|--------------------------|
| <b>29</b> | Was study design standardized such that results can be compared with similar preclinical studies? | <input type="checkbox"/> | <input type="checkbox"/> |
